# Supplementary material for: Chemical fixation of carbon dioxide catalyzed via covalent triazine frameworks as metal free heterogeneous catalysts without a cocatalyst
Source: Royal Society of Chemistry journal article supplement (doi:10.1039/c9ta07266g), 2019-01-01
Supplement: c9ta07266g1.pdf [file c9ta07266g1.pdf]

**Electronic Supplementary Material (ESI) for Journal of Materials Chemistry A. This journal is © The Royal Society of Chemistry 2019**

*Electronic Supplementary Information for*

**Chemical fixation of carbon dioxide catalyzed via covalent triazine frameworks as metal free heterogeneous catalysts without cocatalyst**

*Yi-Meng Li,<sup>a</sup> Li Yang,<sup>acd</sup> Lei Sun,<sup>a</sup> Lei Ma,<sup>\*b</sup> Wei-Qiao Deng,<sup>ac</sup> Zhen Li<sup>\*a</sup>*

*a. Institute of Molecular Sciences and Engineering, Institute of Frontier and Interdisciplinary Science, Shandong University, Qingdao 266237, P. R. China. Email:*

*zhen\_li@sdu.edu.cn*

*b. School of Materials Science and Engineering, Shenyang University of Chemical Technology, Shenyang, 110142, P. R. China. E-mail: malei@syuct.edu.cn*

*c. State Key Laboratory of Molecular Reaction Dynamics, Dalian Institute of Chemical Physics, DaLian, 116023, P. R. China.*

*d. University of the Chinese Academy of Sciences, Beijing 100039, P. R. China.*

Table S 1 Overview of the detailed synthesis parameters used for the CTFs discussed in this work

| Materials     | 2,5-DCP<br>/g | ZnCl <sub>2</sub><br>/g | Mass ratio of<br>ZnCl <sub>2</sub> /monomer | Reaction conditions         |
|---------------|---------------|-------------------------|---------------------------------------------|-----------------------------|
| 2,5-DCP-CTF-0 | 1             | 10                      | 1:10                                        | 400 °C/40 h                 |
| 2,5-DCP-CTF-1 | 1             | 10                      | 1:10                                        | 600 °C/40 h                 |
| 2,5-DCP-CTF-2 | 1             | 12                      | 1:12                                        | 400 °C/20 h and 600 °C/20 h |
| 2,5-DCP-CTF-3 | 1             | 10                      | 1:10                                        | 400 °C/20 h and 600 °C/20 h |
| 2,5-DCP-CTF-4 | 1             | 12                      | 1:12                                        | 400 °C/20 h and 600 °C/60 h |

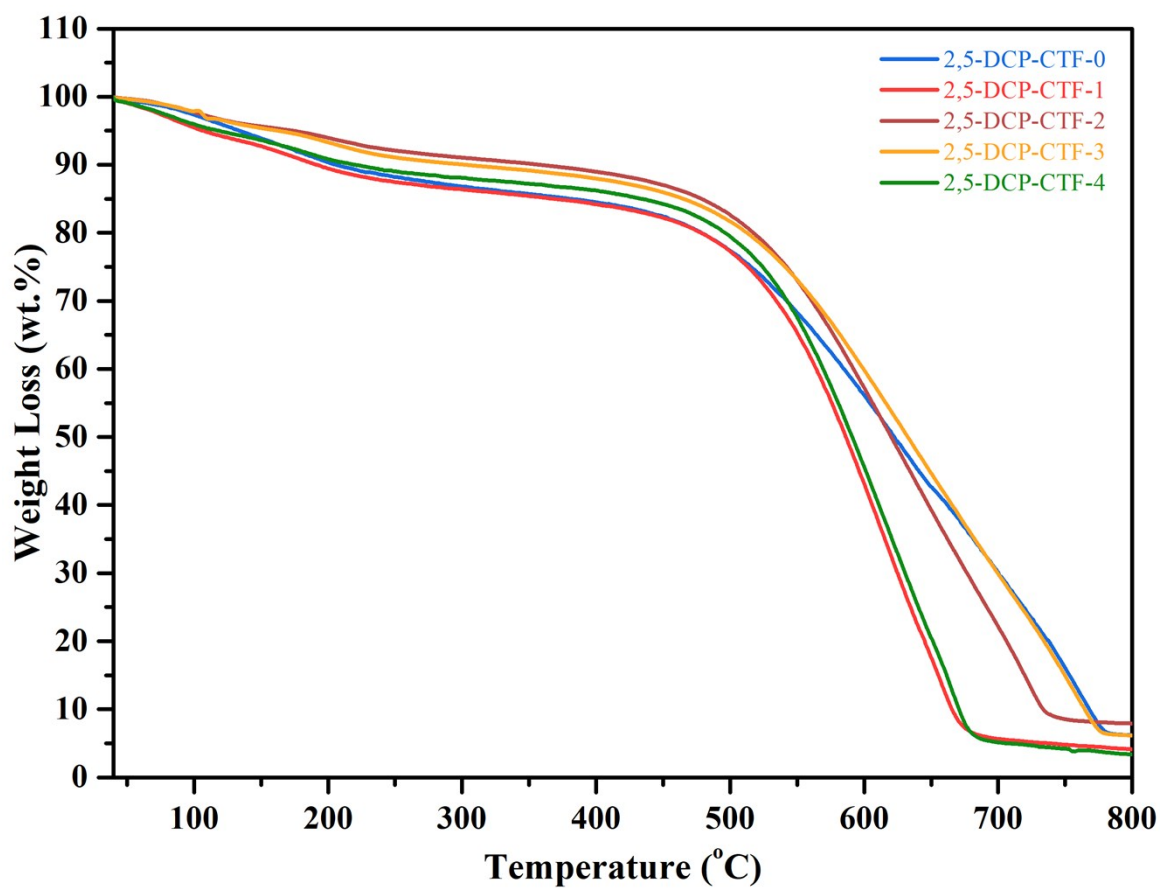

Fig. S1 TGA curves of 2,5-DCP-CTF under air.

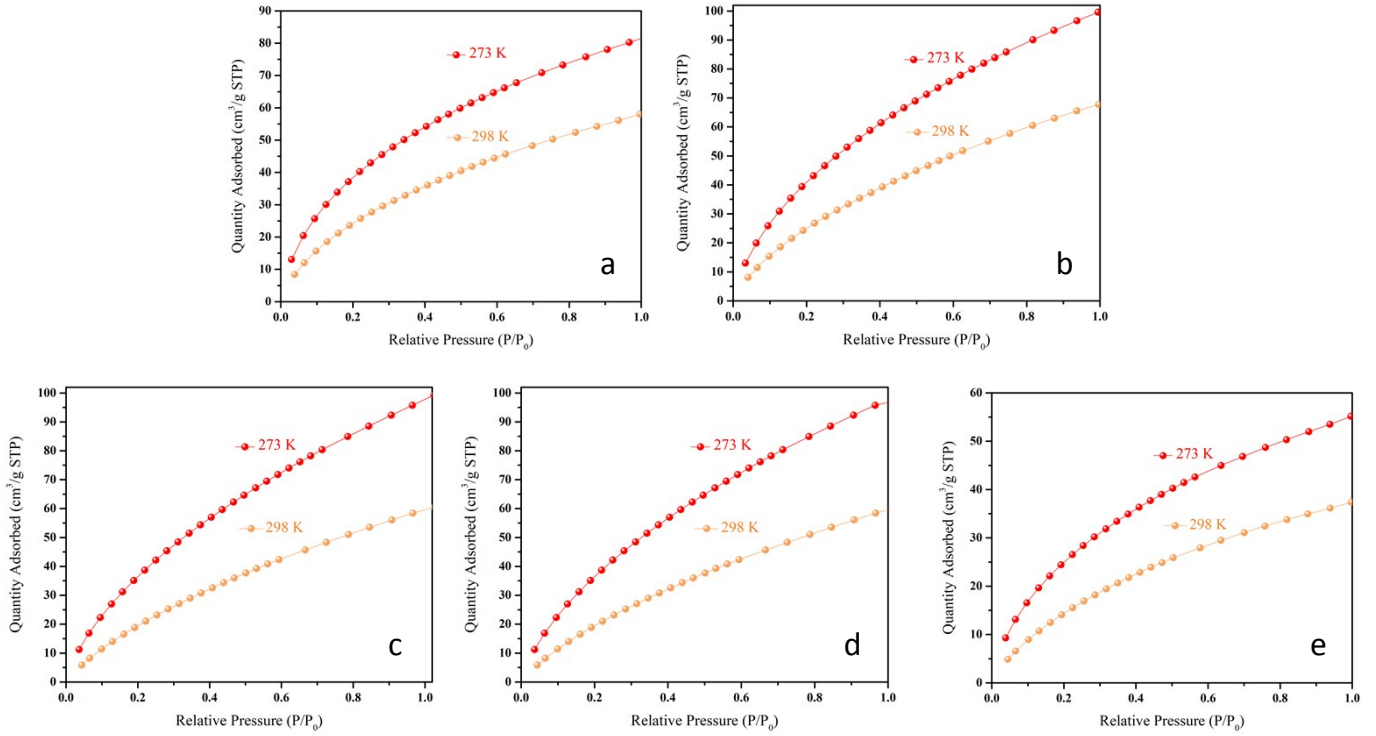

Fig. S2 CO<sub>2</sub> adsorption isotherms and the dual-site Langmuir to fit the CO<sub>2</sub> adsorption isotherms of 2,5-DCP-CTF-0, 2,5-DCP-CTF-1, 2,5-DCP-CTF-2, 2,5-DCP-CTF-3, 2,5-DCP-CTF-4 measured at 273 K and 298K (symbol : CO<sub>2</sub> adsorption isotherms, line: the dual-site Langmuir to fit the CO<sub>2</sub> adsorption isotherms).

Dual-site Langmuir parameter for adsorption of CO<sub>2</sub> in 2,5-DCP-CTF. These parameters were determined by fitting adsorption isotherms for temperatures ranging from 278 K to 473 K.

$$2,5\text{-DCP-CTF-0: } q = q_A + q_B = \frac{q_{sat,A} b_A P}{1 + b_A P} + \frac{q_{sat,B} b_B P}{1 + b_B P}$$

$$q_{sat,A} = 213.60 \text{ cm}^3/\text{g}$$

$$q_{sat,B} = 34.03 \text{ cm}^3/\text{g}$$

$$b_A = b_{A0} \exp\left(\frac{E_A}{RT}\right);$$

$$b_{A0} = 2.38 \times 10^{-7} \text{ kPa}^{-1}$$

$$E_A = 17.12 \text{ kJ mol}^{-1}$$

$$b_B = b_{B0} \exp\left(\frac{E_B}{RT}\right)$$

$$b_{B0} = 7.94 \times 10^{-7} \text{ kPa}^{-1}$$

$$E_B = 32.55 \text{ kJ mol}^{-1}$$

Table S2. Overview of the detailed parameters determined by fitting adsorption isotherms for temperatures ranging from 273 K to 298 K.

| entry         | $q_{sat,A}$<br>cm <sup>3</sup> /g | $q_{sat,B}$<br>cm <sup>3</sup> /g | $b_{A0}$<br>KPa <sup>-1</sup> | $E_A$<br>kJ mol <sup>-1</sup> | $b_{B0}$<br>KPa <sup>-1</sup> | $E_B$<br>kJ mol <sup>-1</sup> | $Q_{st}$<br>kJ mol <sup>-1</sup> |
|---------------|-----------------------------------|-----------------------------------|-------------------------------|-------------------------------|-------------------------------|-------------------------------|----------------------------------|
| 2,5-DCP-CTF-0 | 213.60                            | 34.03                             | $2.38 \times 10^{-7}$         | 172.12                        | $7.94 \times 10^{-7}$         | 32.55                         | 32.55                            |
| 2,5-DCP-CTF-1 | 192.97                            | 32.32                             | $1.42 \times 10^{-6}$         | 19.26                         | $1.03 \times 10^{-6}$         | 27.66                         | 27.66                            |
| 2,5-DCP-CTF-2 | 239.99                            | 20.94                             | $3.36 \times 10^{-7}$         | 21.69                         | $1.07 \times 10^{-7}$         | 31.88                         | 31.88                            |
| 2,5-DCP-CTF-3 | 240.12                            | 19.06                             | $3.32 \times 10^{-7}$         | 18.59                         | $1.08 \times 10^{-7}$         | 30.06                         | 30.06                            |
| 2,5-DCP-CTF-4 | 86.78                             | 15.51                             | $8.80 \times 10^{-10}$        | 21.45                         | $1.77 \times 10^{-10}$        | 32.03                         | 32.03                            |

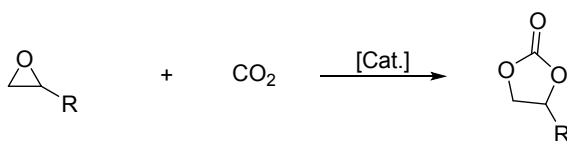

Scheme S1 Cycloaddition of CO<sub>2</sub> to different starting epoxides.

Table S3 Synthesis of cyclic carbonates from epoxides and CO<sub>2</sub> catalyzed by 2,5-DCP-CTF-0.

| Entry            | Epoxide        | Conversion/% <sup>[b]</sup> | Selectivity<br>/% <sup>[b]</sup> | Yield<br>/% |
|------------------|----------------|-----------------------------|----------------------------------|-------------|
| 1 <sup>[a]</sup> | epbromohydrin  | 97.5                        | 85.6                             | 83          |
| 2 <sup>[a]</sup> | propyleneoxide | 98.4                        | 41.5                             | 41          |
| 3 <sup>[a]</sup> | styreneoxide   | 51.9                        | 95.0                             | 49          |

[a] Reaction conditions: 18 mmol epichlorohydrin, 100 mg catalyst, 130 °C, 10 bar CO<sub>2</sub>, 4 h, without solvent.

[b] Determined by GC-MS using toluene as internal standard.

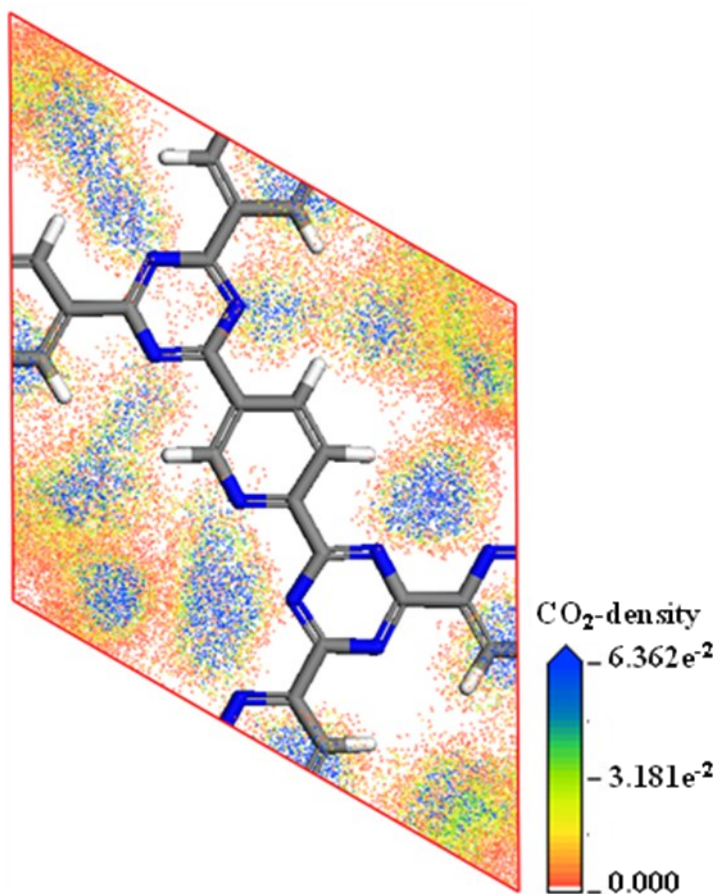

Fig. S3 Density field for CO<sub>2</sub> in 2,5-DCP-CTF at 273 K and 30 bar (blue: N; gray: C; white: H) computed by Sorption.
